# Supplementary material
Source: PubMed Central journal article supplement (PMC4703322)
Supplement: NIHMS748144-supplement-Supplemental_material.pdf [file NIHMS748144-supplement-Supplemental_material.pdf]

## Deletion of *Panx3* prevents the development of surgically induced osteoarthritis

Paxton M. Moon\*<sup>1</sup>, Silvia Penuela\*<sup>2</sup>, Kevin Barr<sup>2</sup>, Sami Khan<sup>1</sup>, Christopher L. Pin<sup>1,3,4,5</sup>, Ian Welch<sup>6</sup>, Mukundan Attur<sup>7</sup>, Steven B. Abramson<sup>7</sup>, Dale W. Laird\*\*<sup>1,2</sup>, Frank Beier\*\*<sup>1,5</sup>

### Electronic Supplementary Material

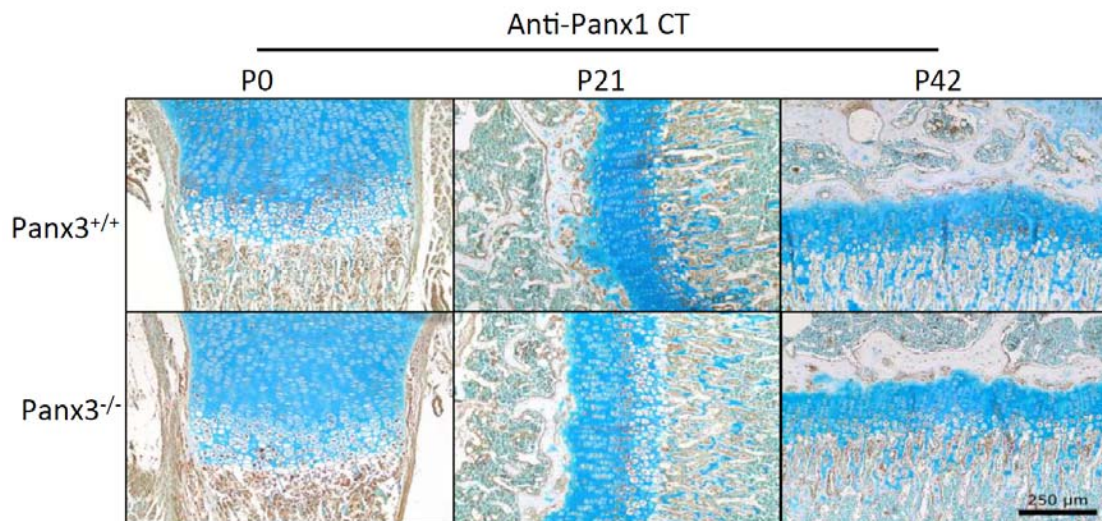

**Supplemental Figure 1. Panx1 localization in the murine growth plate during endochondral bone growth at P0, P21 and P42.** Sections through murine tibiae at P0, P21 and P42 were immunostained with anti-Panx1 antibodies and counterstained using methyl green. Panx1 appears to be ubiquitously expressed throughout the endochondral growth plate at all 3 time points investigated.

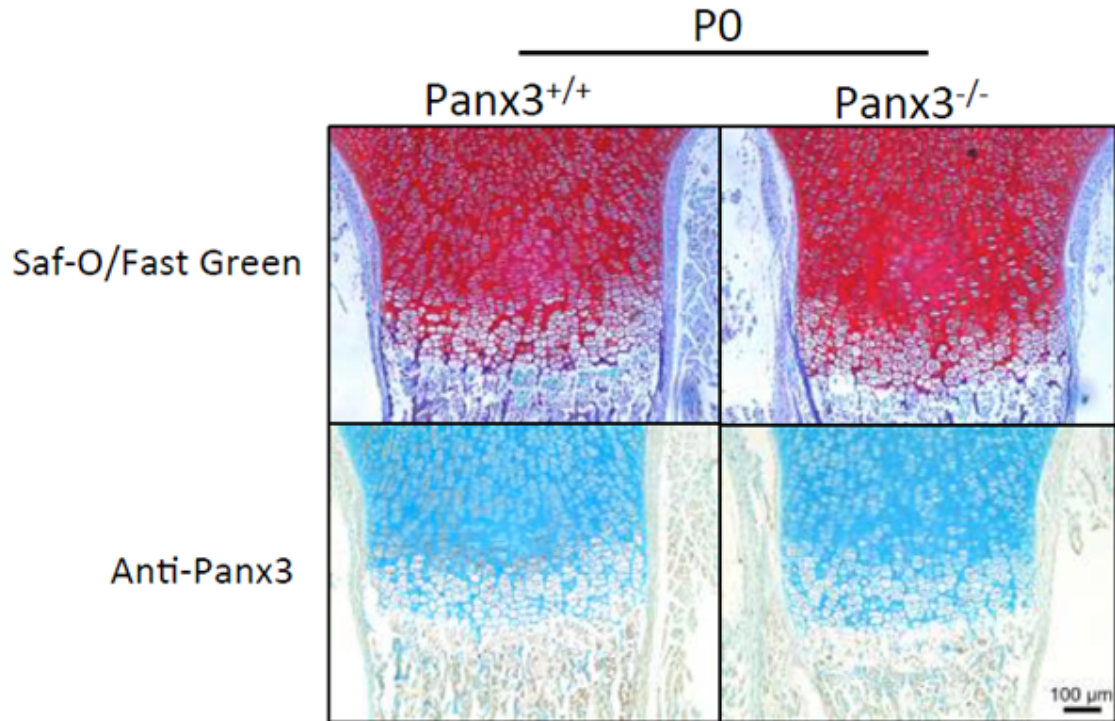

**Supplemental Figure 2. Whole growth plate images in WT and *Panx3*<sup>-/-</sup> mice.**

Sections through murine tibiae at P0 were stained with Safranin-O/Fast Green and immunolabelled with anti-Panx3 antibodies with methyl green counterstain.
